# Supplementary material for: Construction of [Ag2X2]-based complexes from reactions of Ag(i) salts with N-diphenylphosphanylmethyl-4-aminopyridine: isolation, structures, and luminescent properties
Source: Royal Society of Chemistry journal article supplement (doi:10.1039/b925081f), 2010-01-01

## Electronic Supplementary Information (ESI)

### Construction of $[\text{Ag}_2\text{X}_2]$ -based complexes from reactions of Ag(I) salts with N-diphenylphosphanylmethyl-4-aminopyridine: isolation, structures, and luminescent properties†

Ni-Ya Li,<sup>a,b</sup> Zhi-Gang Ren,<sup>a</sup> Dong Liu,<sup>a</sup> Rong-Xin Yuan,<sup>c</sup> Li-Pei Wei,<sup>a</sup> Liang Zhang,<sup>a</sup>  
Hong-Xi Li,<sup>a</sup> and Jian-Ping Lang<sup>\*a,b</sup>

<sup>a</sup> College of Chemistry, Chemical Engineering and Materials Science, Suzhou University, Suzhou 215123, People's Republic of China

<sup>b</sup> State Key Laboratory of Organometallic Chemistry, Shanghai Institute of Organic Chemistry, Chinese Academy of Sciences, Shanghai 200032, People's Republic of China

<sup>c</sup> Jiangsu Laboratory of Advanced Functional Materials, Changshu Institute of Technology, Changshu 215500, People's Republic of China

**Fig. S1** Powder XRD patterns of (a)  $[\{Ag_2(CN)_2(dppmapy)\} \cdot 0.5CHCl_3]_n$  (**1**); (b)  $[Ag_2(dca)_2(dppmapy)_2]_n$  (**2**); (c)  $[Ag_2(SCN)_2(dppmapy)_2]_n$  (**3**); (d)  $[\{Ag_2Cl_2(dppmapy)_2\} \cdot 0.5MeOH \cdot 0.5CH_2Cl_2]_n$  (**4**); (e)  $[\{Ag_2Br_2(dppmapy)_2\} \cdot 2CHCl_3]_n$  (**5**); (f)  $[Ag_2I_2(dppmapy)_4] \cdot 3MeOH$  (**6**). Red: simulated from single crystal analysis and experimental; Black: as synthesized.

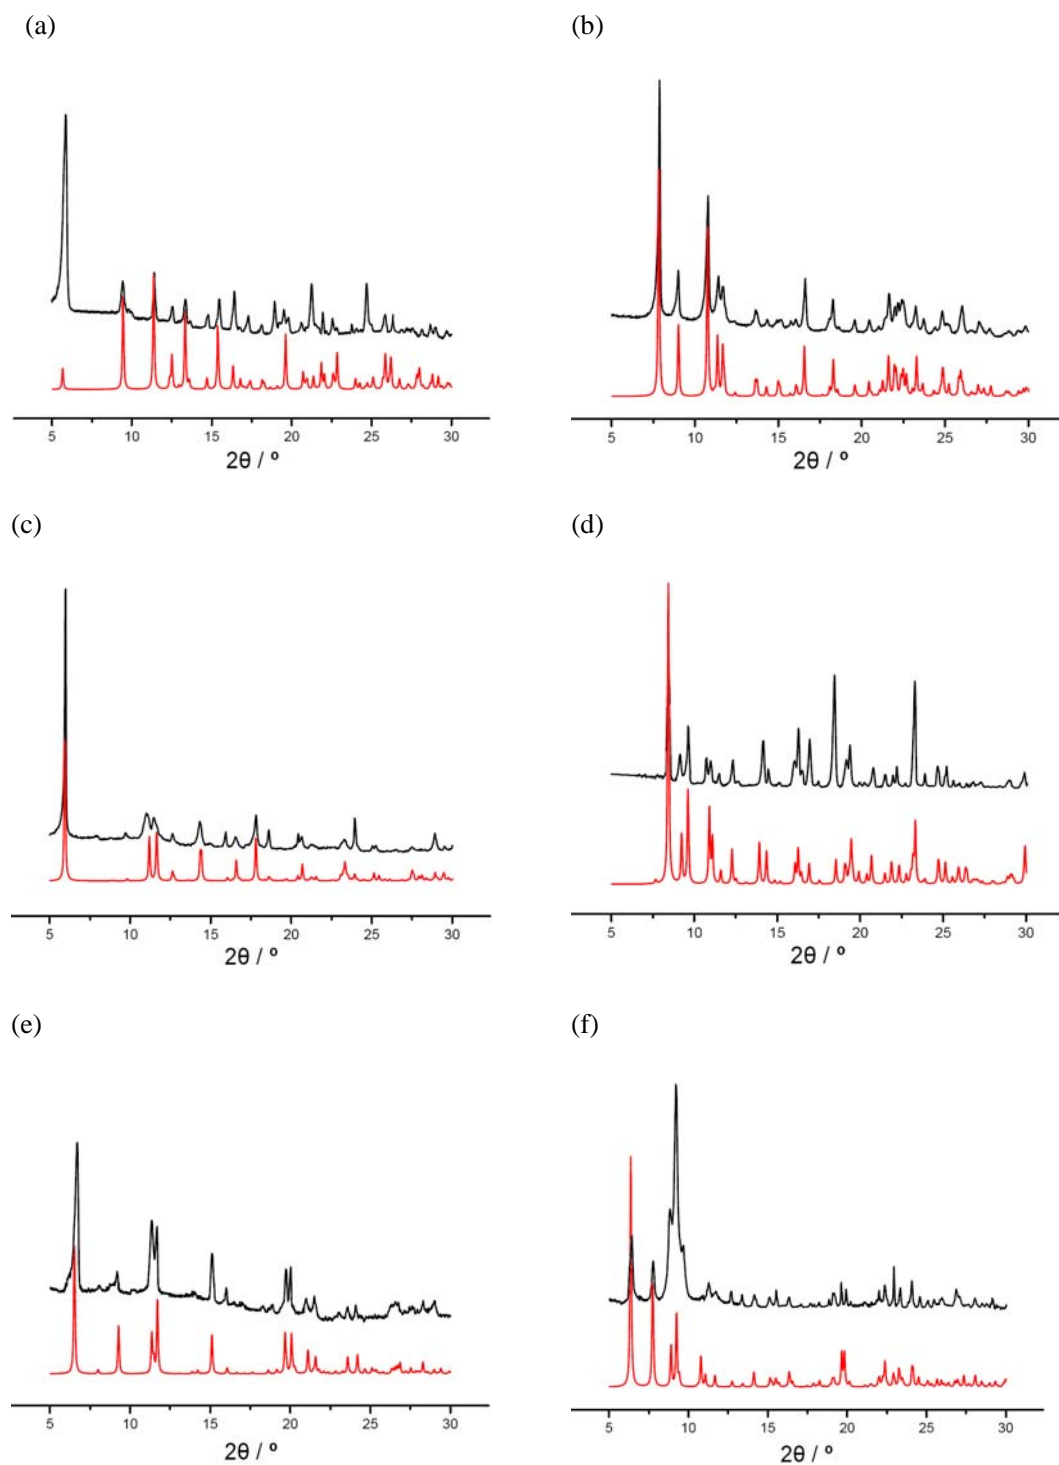

Supplement: b925081f.pdf [file b925081f.pdf]
